# Supplementary material
Source: publisher site journal article supplement (https://www.dovepress.com/article/311970)
Supplement: Supplementary file 1 [file get_supplementary_file.php]

**Supplemental Material**

**Construction and validation of a nomogram for predicting the risk of deep vein thrombosis in hepatocellular carcinoma patients after laparoscopic hepatectomy: a retrospective study**

Yao Chen, MD, Jianping Zhao, MD, PhD, Zhanguo Zhang, MD, PhD, Zeyang Ding, MD, PhD, Yifa Chen, MD, PhD, Xiaoping Chen, MD, PhD, Wanguang Zhang, MD, PhD

**Table of Contents**

1. **Appendix A1......................................................................... 2**

**2. Appendix A2........................................................................ 3**

**3. Appendix A3........................................................................ 4**

**4. Appendix A4........................................................................ 5**

**5. Appendix A5........................................................................ 6**

**Appendix A1** The R packages used for statistical analysis

The “rms” package was used for multivariate logistic regression analysis, nomogram construction and calibration. The “ResourceSelection” package was used for Hosmer-Lemeshow goodness of fit test. The “pROC” package was used for the receiver operator characteristic (ROC) curve analysis. The “ggplot2” package was used to draw the figures. The “rmda” package was used for decision curve analysis.

**Appendix A2** The distribution of the DVT

| Variables | Total | | TS | | VS | |
| --- | --- | --- | --- | --- | --- | --- |
| n = 66 | % | n = 46 | % | n = 22 | % |
| Unilateral distal DVT | 40 | 60.6% | 29 | 64.5% | 11 | 52.4% |
| Bilateral distal DVT | 24 | 36.4% | 14 | 31.1% | 10 | 47.6% |
| Unilateral proximal DVT | 2 | 3.0% | 2 | 4.4% | 0 | - |
| Bilateral proximal DVT | 0 | - | 0 | - | 0 | - |

Abbreviations: DVT, deep venous thrombosis; TS, training set; VS, validation set.

**Appendix A3** Clinicopathological features of the No DVT and DVT patients

| Variables | Total  n = 355 | No DVT  n = 289 | DVT  n = 66 | OR  (95%CI) | *p* |
| --- | --- | --- | --- | --- | --- |
| Age (years) (≥ 60) | 112 (31.5) | 89 (30.8) | 23 (34.8) | 2.115 (1.228 - 3.642) | 0.006 |
| Sex (male) | 286 (80.6) | 247 (85.5) | 39 (59.1) | 0.246 (0.136 - 0.443) | <0.001 |
| BMI (kg/m2) (> 25) | 63 (17.7) | 40 (18.5) | 23 (34.8) | 3.330 (1.816 - 6.106) | <0.001 |
| Comorbidities (yes) | 75 (21.1) | 44 (15.2) | 31 (47.0) | 4.932 (2.761 - 8.810) | <0.001 |
| Virus hepatitis (yes) | 258 (72.7) | 206 (71.3) | 52 (78.8) | 0.794 (0.428 - 1.473) | 0.464 |
| Hematocrit grade (≥ 39) | 228 (64.2) | 196 (67.8) | 32 (48.5) | 0.447 (0.260 - 0.768) | 0.003 |
| PLT (x109/L) | 167.3 ± 51.9 | 166.2 ± 52.7 | 169.6 ± 50.3 | 1.001 (0.996 - 1.006) | 0.485 |
| INR | 1.1 ± 0.1 | 1.1 ± 0.1 | 1.0 ± 0.1 | 2.259 (0.079 - 64.836) | 0.478 |
| Portal hypertension (yes) | 60 (16.9) | 40 (13.8) | 16 (24.2) | 1.782 (0.932 - 3.406) | 0.081 |
| Tumor number (multiple) | 52 (14.6) | 46 (15.9) | 6 (9.0) | 0.528 (0.216 - 1.295) | 0.157 |
| MTS (cm) | 4.3 ± 2.9 | 4.2 ± 2.8 | 4.4 ± 3.2 | 0.939 (0.844 - 1.044) | 0.611 |
| BCLC stage (A) | 326 (91.8) | 263 (91.0) | 63 (95.5) | 2.076 (0.609 - 7.076) | 0.321 |
| Extent of hepatectomy (major) | 104 (29.3) | 91 (31.5) | 13 (19.7) | 0.534 (0.277 - 1.028) | 0.058 |
| OPP (lateral position) | 133 (37.5) | 92 (31.8) | 41 (61.1) | 3.512 (2.015 - 6.120) | <0.001 |
| OT (hour) | 5.5 ± 1.7 | 5.4 ± 1.6 | 5.7 ± 1.8 | 0.853 (0.718 - 1.014) | 0.060 |
| IT (yes) | 95 (26.8) | 70 (24.2) | 25 (37.9) | 1.908 (1.084 - 3.358) | 0.024 |
| Hemostatics (yes) | 19 (5.4) | 12 (4.2) | 7 (10.6) | 2.739 (1.034 - 7.251) | 0.036 |
| Complication grade | 97 (27.3) | 76 (26.3) | 21 (31.9) | 1.514 (0.471 - 4.871) | 0.484 |
| ≥ 3 | 18 (5.1) | 13 (4.5) | 5 (7.6) |
| < 3 | 79 (22.2) | 63 (21.8) | 16 (24.2) |

Abbreviations: DVT, deep vein thrombosis; BMI, body mass index; PLT, platelets; INR, international normalized ratio; MTS, maximum tumor size; BCLC, barcelona clinic liver cancer; OPP, operative position; OT, operative time; IT, intraoperative transfusion; OR, odds ratio; CI, confidence interval.

**Appendix A4** Performance of the TRN in the TS and the VS

| Variable | TS | VS |
| --- | --- | --- |
| AUC (95%CI) | 0.861 (0.802-0.920) | 0.818 (0.716-0.919) |
| H-L test *p* value | 0.626 | 0.259 |
| Sensitivity (95%CI) | 44.4 (30.0-59.9) | 38.1 (19.0-61.3) |
| Specificity (95%CI) | 96.5 (92.6-98.4) | 98.9 (93.2-99.9) |
| PPV (95%CI) | 74.1 (53.4-88.1) | 88.9 (50.7-99.4) |
| NPV (95%CI) | 88.4 (83.2-92.2) | 87.4 (79.0-92.8) |
| Accuracy (95%CI) | 86.8 (82.5-91.1) | 87.5 (81.4-93.6) |

Abbreviations: TRN, DVT risk nomogram; DVT, deep vein thrombosis; AUC, area under the curve; H-L test, hosmer-lemeshow goodness of fit test; PPV, positive predictive value; NPV, negative predictive value; CI, confidence interval; TS, training set; VS, validation set.

**Appendix A5** The distribution of patients according to the Caprini score

| Caprini score | TS | | VS | |
| --- | --- | --- | --- | --- |
| No DVT (n=198) | DVT (n=45) | No DVT (n=91) | DVT (n=21) |
| 5 (%) | 28(14.1) | 5 (11.1) | 12 (13.2) | 4 (19.0) |
| 6 (%) | 99(50.0) | 14 (31.1) | 40 (44.0) | 6 (28.6) |
| 7 (%) | 47(23.8) | 20 (44.5) | 23 (25.3) | 9 (42.9) |
| 8 (%) | 24(12.1) | 6 (13.3) | 16 (17.6) | 2 (9.5) |

Abbreviations: DVT, deep venous thrombosis; TS, training set; VS, validation set.
